# Supplementary material for: Circulating Lymphocytes Reflect the Local Immune Response in Patients with Colorectal Carcinoma
Source: MDPI journal article supplement (doi:10.3390/diagnostics12061408), 2022-06-07
Supplement: s1 [file s1]

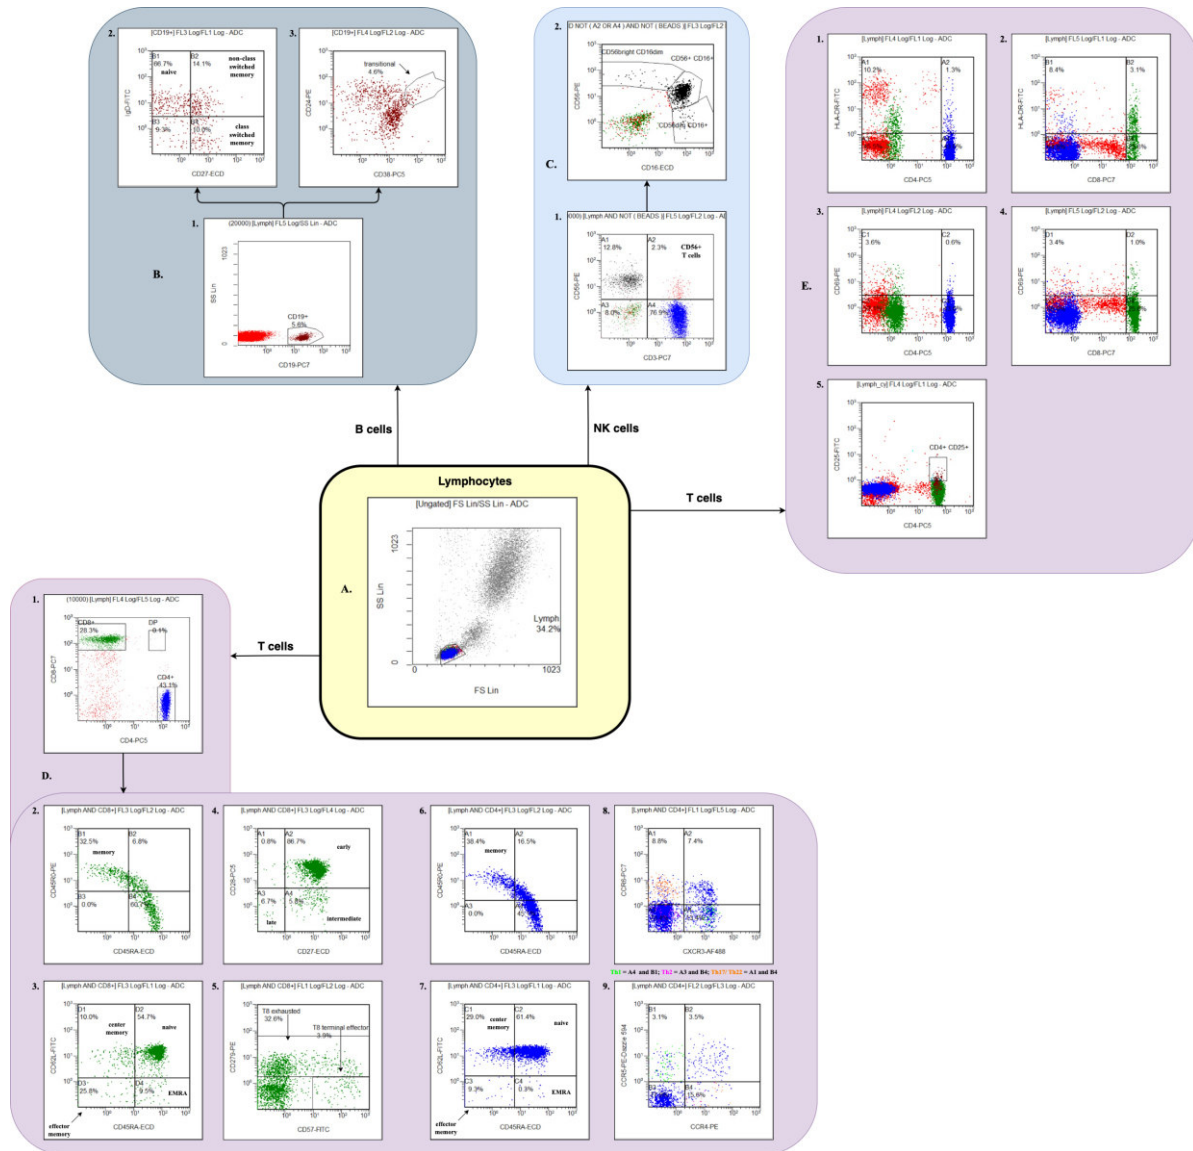

**Figure S1. Gating Strategy.** (A.) Lymphocytes were identified by using forward scatter (FC) and side scatter (SC). (B.) Additional CD19 positivity was used to define B cells (Plot 1), which were further subdivided into naïve (IgD+), class switched memory (CD27+), non-class switched memory (IgD+ CD27+, Plot 2) and transitional B cells (CD24+ CD38+, Plot 3). (C.) NKT cells (CD3+ CD56+) were primarily identified (Plot 1). CD3- cells were classified into 3 different subgroups of NK cells (CD56+ CD16+, CD56bright CD56 dim, CD56dim CD16bright, Plot 2).

(D.) T cells were identified by CD4 or CD8 positivity. Both CD4+ as well as CD8+ cells were subdivided into memory (CD45RA- CD45RO+) (Plots 1+6), naïve (CD62L+ CD45RA+), central memory (CD62L+ CD45RA-), effector memory (CD62L- CD45RA-) and effector memory RA+ ("EMRA") (CD62L- CD45RA+) cells (Plots 3+7). To analyze CD8+ cell activity, cells were subdivided into early (CD27+ CD28+), intermediate (CD27+ CD28-), late (CD27- CD28-) (Plot 4), or exhausted (CD279+) and terminal effector (CD279- CD57+) cells (Plot 5). CD4+ T helper cells were classified into Th1 (CXCR3+ CCR4- CCR5+ CCR6-), Th2 (CXCR3- CCR4+ CCR5- CCR6-) and Th17/Th22 (CXCR3- CCR4+ CCR5- CCR6+) cells (Plots 8+9). (E.) CD4+ and CD8+ cells were also subdivided into activated cells (HLA-DR+ or CD69+) (Plots 1-4) and regulatory cells (CD4+ CD25high) (Plot 5).

**Table S1: Fluorochrome-antibody conjugates**

| Cell population                          | Antigen       | Fluorochrome  | Clone        | Isotype    | Beckman Coulter/Biolegend item number |
|------------------------------------------|---------------|---------------|--------------|------------|---------------------------------------|
| B                                        | IgD           | FITC          | IA6-2        | IgG2a      | B30652                                |
| B                                        | CD24          | PE            | ALB9         | IgG1       | IM1428U                               |
| B, exhausted T                           | CD27          | ECD           | 1A4CD27      | IgG1       | B26603                                |
| B                                        | CD38          | PC5           | LS198-4-3    | IgG1       | A07780                                |
| B                                        | CD19          | PC7           | J3-119       | IgG1 kappa | IM3628                                |
| Memory T                                 | CD62L         | FITC          | DREG56       | IgG1       | IM1231U                               |
| Memory T                                 | CD45 R0       | PE            | UCHL1        | IgG2a      | A07787                                |
| Memory T, Treg                           | CD45RA        | ECD           | 2H4LDH11LDB9 | IgG1       | IM2711U                               |
| Memory T, activated T, Treg, Th subsets  | CD4           | PC5           | 13B8.2       | IgG1       | A07752                                |
| Memory T, Treg, exhausted T, activated T | CD8           | PC7           | SFC121Thy2D3 | IgG1       | 737661                                |
| Exhausted CD8-T                          | CD57          | FITC          | NC1          | IgM        | B49188                                |
| Exhausted CD8-T                          | CD279         | PE            | PD1.3        | IgG2b      | B30634                                |
| Exhausted CD8-T                          | CD28          | PC5           | CD28.2       | IgG1       | 6607108                               |
| Activated T                              | HLA-DR        | FITC          | Immu-357     | IgG1       | IM1638U                               |
| Activated T                              | CD69          | PE            | TP1.55.3     | IgG2b      | IM1943U                               |
| Treg                                     | CD25          | FITC          | B1.49.9      | IgG2a      | IM0478U                               |
| Treg                                     | FoxP3         | PE            | Ab259D       | IgG1 kappa | B46031                                |
| T/NK                                     | CD56          | PE            | N901/NK-1    | IgG1       | A07788                                |
| T/NK                                     | CD16          | ECD           | 3G8          | IgG1       | A33098                                |
| T/NK                                     | CD19          | PC5           | J3-119       | IgG1       | A07771                                |
| T/NK                                     | CD3           | PC7           | UCHT1        | IgG1       | 737657                                |
| Th subsets                               | CD183 (CXCR3) | AF488         | G025H7       | IgG1       | B68144                                |
|                                          | CD194 (CCR4)  | PE            | L291H4       | IgG1       | 359412                                |
|                                          | CD195 (CCR5)  | PE/Dazzle 594 | J418F1       | IgG2b      | 359126                                |
|                                          | CD196 (CCR6)  | PC7           | B-R35        | IgG2a      | B68132                                |

*FITC* fluorescein isothiocyanate, *PE* phycoerythrin, *ECD* phycoerythrin-Texas red, *PC-5* phycoerythrin cyanin, *PC7* phycoerythrin cyanin7, *AF488* Alexa-Fluor 488
